# Supplementary material for: Spinel cobalt-based binary metal oxides as emerging materials for energy harvesting devices: synthesis, characterization and synchrotron radiation-enabled investigation
Source: Royal Society of Chemistry journal article supplement (doi:10.1039/d4ra03462g), 2024-01-01

## Supporting Information

### Spinel Cobalt-Based Binary Metal Oxides as Emerging Materials for Energy Harvesting Devices: Synthesis, Characterization and Synchrotron Radiation-Enabled Investigation

Abdelelah Alshanaheh,<sup>a</sup> Yusuf Selim Ocak,<sup>a,b</sup> Bashar Aljawrneh,<sup>\*,c</sup> Borhan Aldeen Albiss,<sup>a</sup> Khaled Shawakfeh,<sup>d</sup> Latif U. Khane,<sup>e</sup> Messaoud Harfouchee,<sup>e</sup> and Saja Alrousan<sup>a</sup>

<sup>a</sup>Nanotechnology Institute, Jordan University of Science & Technology, P.O. Box 3030, Irbid-22110, Jordan.

<sup>b</sup>Department of Physics, Al-Zaytoonah University of Jordan, P.O. Box 130, Amman-11733, Jordan.

<sup>c</sup>Department of Chemistry, Jordan University of Science & Technology, P.O. Box 3030, Irbid-22110, Jordan.

<sup>d</sup>Smart-Lab, Dicle University, Diyarbakir, 21020, Turkiye

<sup>e</sup>Synchrotron-light for Experimental Science and Applications in the Middle East (SESAME) P.O. Box 7, Allan 19252, Jordan

**Figure S1:** XRD patterns of various spinel cobalt-based metal oxide films

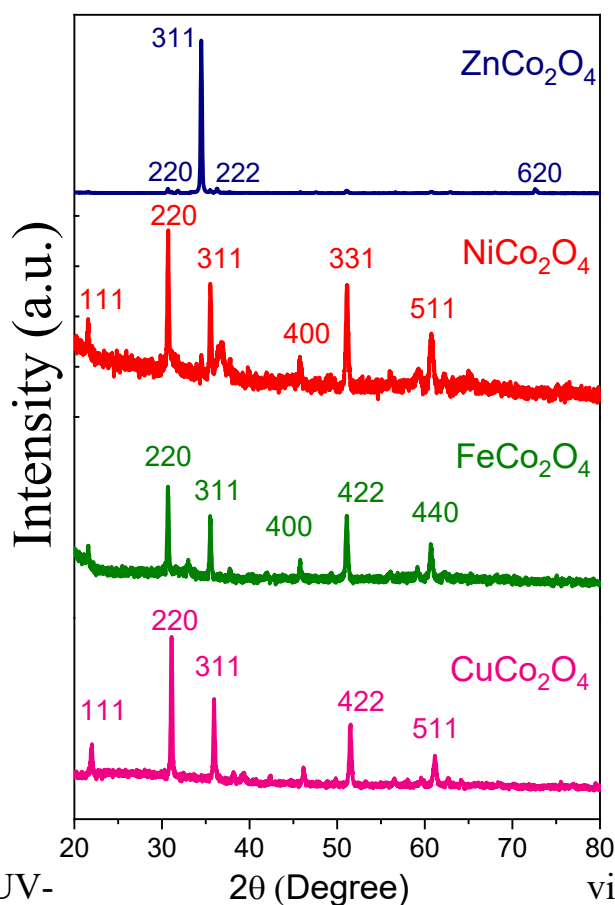

**Figure S2:** The UV-vis-NIR absorption

# spectrum of spinel cobalt based metal oxide films and the corresponding band gap energies

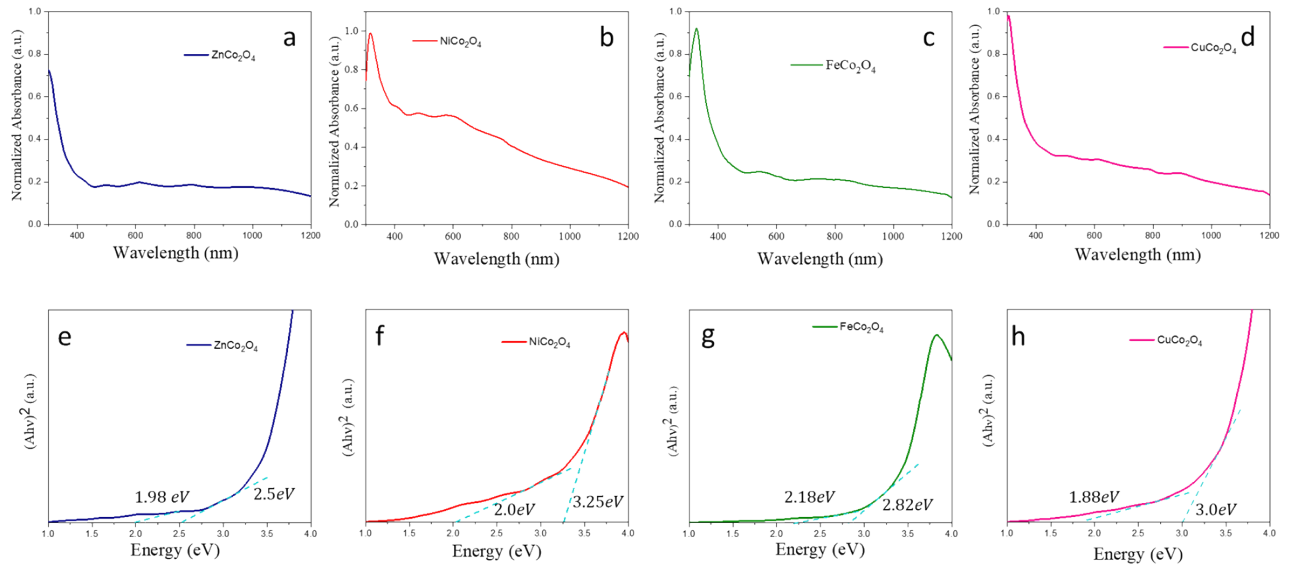

Supplement: d4ra03462g1.pdf [file d4ra03462g1.pdf]
